# Supplementary material for: Optimal Contract Design for a National Brand Manufacturer Under Store Brand Private Information
Source: Atypon-hosted journal article supplement (doi:10.1287/msom.2021.0187), 2023-06-19
Supplement: msom.2021.0187.sm1.pdf [file msom.2021.0187.sm1.pdf]

## Appendix to “Optimal Contract Design for a National Brand Manufacturer under Store Brand Private Information”

### Appendix A

In this appendix, we list all mathematical notations used in the main paper in Table A1 below.

| Notation                  | Definition                                                                 |
|---------------------------|----------------------------------------------------------------------------|
| $\Pi_n$ [ $\hat{\Pi}_n$ ] | NB manufacturer’s profit function under asymmetric [symmetric] information |
| $\Pi_r$ [ $\hat{\Pi}_r$ ] | Retailer’s profit function under asymmetric [symmetric] information        |
| $Q_n$ [ $Q_s$ ]           | NB [SB] production quantity                                                |
| $p_n$ [ $p_s$ ]           | NB [SB] product retail price                                               |
| $q_n$ [ $q_s$ ]           | NB [SB] product quality                                                    |
| $\theta$                  | Consumer’s quality evaluation parameter                                    |
| $c_n$ [ $c_s$ ]           | NB [SB] unit production cost                                               |
| $c_s^H$ [ $c_s^L$ ]       | Estimated high-type [low-type] SB unit production cost                     |
| $w$                       | Unit wholesale price paid to the NB manufacturer                           |
| $T$                       | Fixed lump-sum payment paid to the NB manufacturer                         |
| $w^H$ [ $w^L$ ]           | Unit wholesale price for high-type [low-type] retailer                     |
| $T^H$ [ $T^L$ ]           | Fixed lump-sum payment for high-type [low-type] retailer                   |
| $V_n$ [ $V_r$ ]           | Value of information to NB manufacturer [retailer]                         |
| $CS$                      | Consumer surplus                                                           |

**Table A1 List of mathematical notations**

### Appendix B

In this appendix, we provide proofs for all the results mentioned in the main paper.

*Proof.* **Lemma 1.** We start with deriving the local optima under cases I, II, and III. Under case I, direct differentiation on  $\hat{\Pi}_r^I$  with respect to  $p_n$  yields  $\frac{d\hat{\Pi}_r^I}{dp_n} = \frac{w+q_n-2p_n}{q_n}$  and  $\frac{d^2\hat{\Pi}_r^I}{dp_n^2} = -\frac{2}{q_n} < 0$ . Solving first-order condition equal to 0, we can get  $p_n^{I*} = \frac{w+q_n}{2}$ . It follows that  $Q_n^{I*} = \frac{1}{2} - \frac{w}{2q_n}$  and  $\hat{\Pi}_r^{I*} = \frac{(q_n-w)^2}{4q_n} - T$ .

Under case III, the derivation of  $p_s^{III*}$  is obtained in a similar manner. We have  $p_s^{III*} = \frac{c_s+q_s}{2}$ ,  $Q_s^{III*} = \frac{1}{2} - \frac{c_s}{2q_s}$ , and  $\hat{\Pi}_r^{III*} = \frac{(q_s-c_s)^2}{4q_s}$ .

Under case II, taking derivatives of  $\hat{\Pi}_r^{II}$  with respect to  $p_n$  and  $p_s$ , we obtain  $\frac{\partial \hat{\Pi}_r^{II}}{\partial p_n} = 1 - \frac{2(p_n-p_s)-w+c_s}{q_n-q_s}$ ,  $\frac{\partial \hat{\Pi}_r^{II}}{\partial p_s} = \frac{2(p_n-p_s)-w+c_s}{q_n-q_s} - \frac{2p_s-c_s}{q_s}$ ,  $\frac{\partial^2 \hat{\Pi}_r^{II}}{\partial p_n^2} = \frac{\partial^2 \hat{\Pi}_r^{II}}{\partial p_s^2} = \frac{-2}{q_n-q_s} < 0$ ,  $\frac{\partial^2 \hat{\Pi}_r^{II}}{\partial p_n^2} \frac{\partial^2 \hat{\Pi}_r^{II}}{\partial p_s^2} - \left(\frac{\partial^2 \hat{\Pi}_r^{II}}{\partial p_n \partial p_s}\right)^2 = \frac{4}{q_s(q_n-q_s)} > 0$ . Hence, the Hessian matrix of  $\hat{\Pi}_r^{II}$  is negative definite. Then, by setting  $\frac{\partial \hat{\Pi}_r^{II}}{\partial p_n} = 0$  and  $\frac{\partial \hat{\Pi}_r^{II}}{\partial p_s} = 0$ , we get the interior optimal solution for case II as  $p_n^{II*} = \frac{w+q_n}{2}$ ,  $p_s^{II*} = \frac{c_s+q_s}{2}$ . It follows that  $Q_n^{II*} = \frac{1}{2} - \frac{w-c_s}{2(q_n-q_s)}$ ,  $Q_s^{II*} = \frac{w-c_s}{2(q_n-q_s)} - \frac{c_s}{2q_s}$ , and  $\hat{\Pi}_r^{II*} = \frac{q_n-w}{2} \left[ \frac{1}{2} - \frac{w-c_s}{2(q_n-q_s)} \right] + \frac{q_s-c_s}{2} \left[ \frac{w-c_s}{2(q_n-q_s)} - \frac{c_s}{2q_s} \right] - T$ . Recall that the condition for the occurrence of case II is  $\frac{p_s}{q_s} \leq \frac{p_n-p_s}{q_n-q_s} \leq 1$ . We reorganize this condition as an interval of  $p_s$ , i.e.,  $p_s \in [p_n - q_n + q_s, \frac{p_n q_s}{q_n}]$ . If  $w \leq \frac{c_s q_n}{q_s}$ ,  $\frac{p_n-p_s}{q_n-q_s} < 1$  is satisfied but  $\frac{p_s}{q_s} < \frac{p_n-p_s}{q_n-q_s}$

does not hold. Since  $\hat{\Pi}_r^{II}$  is quasi-concave and monotonically increasing in  $p_s$  within the closed interval  $[p_n - q_n + q_s, \frac{p_n q_s}{q_n}]$ , the local maximum resides at  $p_s = p_n - q_n + q_s$  or  $p_s = \frac{p_n q_s}{q_n}$ . It follows from  $w \leq \frac{c_s q_n}{q_s}$  that  $\hat{\Pi}_r^{II}|_{p_s = \frac{p_n q_s}{q_n}} = \frac{(q_n - w)^2}{4q_n} - T \geq \hat{\Pi}_r^{II}|_{p_s = p_n - q_n + q_s} = \frac{(q_s - c_s)^2}{4q_s} - T$ . Hence,  $\forall w \in (0, \frac{c_s q_n}{q_s}]$ ,  $\hat{\Pi}_r^{II*} = \hat{\Pi}_r^{II}|_{p_s = \frac{p_n q_s}{q_n}} = \frac{(q_n - w)^2}{4q_n} - T = \hat{\Pi}_r^{II*}$ . If  $w$  is in  $(\frac{c_s q_n}{q_s}, c_s + q_n - q_s]$ , the condition  $\frac{p_s}{q_s} \leq \frac{p_n - p_s}{q_n - q_s} \leq 1$  is fully satisfied. Then  $(p_n^{II*}, p_s^{II*}) = (\frac{w + q_n}{2}, \frac{c_s + q_s}{2})$  is indeed the local optimum for case II. If  $w > c_s + q_n - q_s$ ,  $\hat{\Pi}_r^{II*}$  occurs at  $p_s = p_n - q_n + q_s$  such that  $\hat{\Pi}_r^{II*} = \Pi_r^{II*}|_{p_s = p_n - q_n + q_s} = \frac{(q_s - c_s)^2}{4q_s} - T$ . However,  $\hat{\Pi}_r^{II*}|_{p_s = p_n - q_n + q_s} < \hat{\Pi}_r^{III*}$  for any  $T > 0$ . Then if  $p_s = p_n - q_n + q_s$ , it is no longer profitable for the retailer to carry both brands.

We now proceed to search for the global optimal profit, i.e.,  $\hat{\Pi}_r^* = \max\{\hat{\Pi}_r^{I*}, \hat{\Pi}_r^{II*}, \hat{\Pi}_r^{III*}\}$ , through the pairwise comparisons among the three local optima. We have shown that when  $w \leq \frac{c_s q_n}{q_s}$ , if the retailer decides to carry both brands, he has to set the retail prices to satisfy the condition  $\frac{p_s}{q_s} < \frac{p_n - p_s}{q_n - q_s} < 1$ , resulting in a profit that is equivalent to carrying NB only. Therefore, given any  $w \in (0, \frac{c_s q_n}{q_s}]$ , the retailer is better off to carry NB only, i.e.,  $\hat{\Pi}_r^* = \Pi_r^{I*}$ . Note that  $\Pi_r^{I*}$  is decreasing in  $w$  and continuous with  $\hat{\Pi}_r^{III*}$  at  $w = \frac{c_s q_n}{q_s}$ .

When comparing  $\hat{\Pi}_r^{I*}$  and  $\hat{\Pi}_r^{III*}$ , we need to discuss how the retailer's decision differentiates based on  $T$ . Note the lump-sum transfer is not applicable in case III. For any  $w \leq \frac{c_s q_n}{q_s}$ , there exists a threshold transfer  $\bar{T}^I \geq 0$ , such that  $\hat{\Pi}_r^{I*}|_{T = \bar{T}^I} = \Pi_r^{III*}$ . Then we have  $\bar{T}^I = \frac{(q_n - w)^2}{4q_n} - \frac{(q_s - c_s)^2}{4q_s}$ , which is a decreasing function in  $w$ . Hence, if the NB manufacturer (referred as NBM hereafter) charges a wholesale price  $w \in [0, \frac{c_s q_n}{q_s}]$  and a reasonable fixed payment that is lower than the threshold value  $\bar{T}^I(w)$ , it is more profitable for the retailer to not introduce the SB and carry NB only; otherwise, if the fixed payment is higher than the threshold, it would be best for the retailer to only carry SB. Given any  $w \in (\frac{c_s q_n}{q_s}, c_s + q_n - q_s)$ , we first compare  $\hat{\Pi}_r^{I*}$  with  $\hat{\Pi}_r^{II*}$ . We have proved that  $\hat{\Pi}_r^{I*}$  and  $\hat{\Pi}_r^{II*}$  are continuous at  $w = \frac{c_s q_n}{q_s}$ . It is straightforward to show that  $\hat{\Pi}_r^{I*}$  with  $\hat{\Pi}_r^{II*}$  are both monotonically decreasing in  $w$ , and  $\frac{d\hat{\Pi}_r^{II*}(w)}{dw} < \frac{d\hat{\Pi}_r^{I*}(w)}{dw}$ . Therefore, given any  $w \in (\frac{c_s q_n}{q_s}, c_s + q_n - q_s)$ , it is more profitable for the retailer to carry both products than carry NB only. To compare  $\hat{\Pi}_r^{II*}$  with  $\hat{\Pi}_r^{III*}$ , we again recognize a threshold transfer  $\bar{T}^{II} = \frac{(c_s - w + q_n - q_s)^2}{4(q_n - q_s)}$  such that  $\hat{\Pi}_r^{II*}|_{T = \bar{T}^{II}} = \Pi_r^{III*}$ . Note that  $\bar{T}^{II}$  is decreasing in  $w$  and  $\bar{T}^{II}|_{w = c_s + q_n - q_s} = 0$ . Furthermore,  $\bar{T}^I$  and  $\bar{T}^{II}$  are continuous at  $w = \frac{c_s q_n}{q_s}$ . Thus, for any  $w \in (\frac{c_s q_n}{q_s}, c_s + q_n - q_s)$ , if  $0 \leq T \leq \bar{T}^{II}(w)$ ,  $\hat{\Pi}_r^* = \hat{\Pi}_r^{II*}$ ; otherwise,  $\hat{\Pi}_r^* = \hat{\Pi}_r^{III*}$ . When  $w > c_s + q_n - q_s$ , we can directly claim that for any  $T \geq 0$ , it is never profitable for the retailer to carry NB, i.e.,  $\hat{\Pi}_r^* = \hat{\Pi}_r^{III*}$ .  $\square$

*Proof. Proposition 1. Case I:* Based on Lemma 1(ii), the occurrence of case I implies that NBM offers a  $(w, T)$  such that  $w \leq \frac{c_s q_n}{q_s}$  and  $T \leq \bar{T}^I(w)$ , following which the  $Q_n = Q_n^*$ . Since  $\Pi_n^I$  is increasing in  $T$ , we have  $T^* = \bar{T}^I(w)$ . The retailer consequently receives the reservation profit  $\Pi_r^{III*}$ . Substituting  $p_n^{I*}$ ,  $Q_n^{I*}$  and  $T^*$  into  $\Pi_n^I$ , we get  $\frac{d\Pi_n^I(w)}{dw} = \frac{c_n - w}{2q_n}$  and  $\frac{d^2\Pi_n^I(w)}{dw^2} = -\frac{1}{2q_n} < 0$ . We then have the interior optimum  $w^* = c_n$ . If  $c_n \leq \frac{c_s q_n}{q_s}$ , then  $w^* \leq \frac{c_s q_n}{q_s}$  is indeed satisfied. As a result, the NBM's optimal profit under case I becomes  $\Pi_n^{I*} = \Pi_n^I|_{w = c_n} = \frac{(q_n - c_n)^2}{4q_n} - \frac{(q_s - c_s)^2}{4q_s}$ . Otherwise, if  $c_n > \frac{c_s q_n}{q_s}$ , since

the profit function is concave and decreasing on  $w$  for any  $w \leq \frac{c_s q_n}{q_s}$ , the optimal solution exists at  $w^* = \frac{c_s q_n}{q_s}$ . Then We have  $\Pi_n^{I*} = \Pi_n^I|_{w=\frac{c_s q_n}{q_s}} = \frac{2(c_s q_n - c_n q_s)(q_s - c_s) + (q_n - q_s)(q_s - c_s)^2}{4q_s^2}$ .

**Case II:** Following Lemma 1(iii), the occurrence of case II suggests that  $\frac{c_s q_n}{q_s} < w < c_s + q_n - q_s$  and  $T \leq \bar{T}^{II}(w)$ . Again, NBM will set the transfer  $T$  such that  $T^* = \bar{T}^{II}(w)$  and the retailer only earns his reservation profit  $\Pi_r^{III*}$ .

We obtain  $w^* = c_n$  by solving  $\frac{d\Pi_n^{II}(w)}{dw} = 0$ , noting  $\frac{d^2\Pi_n^{II}(w)}{dw^2} < 0$ . If  $c_n \leq \frac{c_s q_n}{q_s}$ ,  $\Pi_n^{II}$  is quasi-concave and decreasing in  $w$  for any  $w \in (\frac{c_s q_n}{q_s}, c_s + q_n - q_s]$ .  $w^*$  then has to be set as  $\frac{c_s q_n}{q_s}$ . Thus  $\Pi_n^{II*} = \Pi_n^{II}|_{w=\frac{c_s q_n}{q_s}} = \frac{2(c_s q_n - c_n q_s)(q_s - c_s) + (q_n - q_s)(q_s - c_s)^2}{4q_s^2} = \Pi_n^I|_{w=\frac{c_s q_n}{q_s}}$ . Otherwise, i.e.,  $\frac{c_s q_n}{q_s} < c_n \leq c_s + q_n - q_s$ ,  $w^* = c_n$  is indeed the optimal solution. Then we have  $\Pi_n^{II*} = \Pi_n^{II}|_{w=c_n} = \frac{(q_n - c_n - q_s + c_s)^2}{4(q_n - q_s)}$ . If  $c_n > c_s + q_n - q_s$ ,  $w^*$  then equals to  $c_s + q_n - q_s$ . Thus,  $\Pi_n^{II*} = \Pi_n^{II}|_{w=c_s + q_n - q_s} = 0$ .

To search for the NBM's global optimal profit  $\Pi_n^*$ , we compare her profit functions under three cases across three intervals of  $c_n$  as follows.

- (i) If  $c_n \leq \frac{c_s q_n}{q_s}$ , then  $\Pi_n^{I*} = \Pi_n^I|_{w^*=c_n}$  and  $\Pi_n^{II*} = \Pi_n^{II}|_{w^*=\frac{c_s q_n}{q_s}}$ . Thus, we have  $\Pi_n^{I*} - \Pi_n^{II*} = \frac{(c_s q_n - c_n q_s)^2}{4q_n q_s^2} \geq 0$ , and  $\Pi_n^{I*} = \frac{(q_n - c_n)^2}{4q_n} - \frac{(q_s - c_s)^2}{4q_s} \geq 0 = \Pi_n^{III}$ . Therefore, if  $c_n \leq \frac{c_s q_n}{q_s}$ , it is best for the NBM to offer a  $(w, T) = (c_n, \bar{T}^I(c_n))$  such that the retailer will carry NB only.
- (ii) If  $\frac{c_s q_n}{q_s} < c_n < c_s + q_n - q_s$ ,  $\Pi_n^{I*} = \Pi_n^I|_{w^*=\frac{c_s q_n}{q_s}}$ ,  $\Pi_n^{II*} = \Pi_n^{II}|_{w^{II*}=c_n}$ . Again, it can be shown that  $\Pi_n^{II*} - \Pi_n^{I*} = \frac{(c_s q_n - c_n q_s)^2}{4q_s^2(q_n - q_s)} > 0$  and  $\Pi_n^{II*} = \frac{(q_n - c_n - q_s + c_s)^2}{4(q_n - q_s)} \geq 0 = \Pi_n^{III}$ . Hence, if  $\frac{c_s q_n}{q_s} < c_n \leq c_s + q_n - q_s$ , NBM's optimal strategy is to offer  $(w, T) = (c_n, \bar{T}^{II}(c_n))$  such that the retailer will agree to carry both NB and SB.
- (iii) If  $c_n \geq c_s + q_n - q_s$ , we have  $\Pi_n^{I*} = \Pi_n^I|_{w^*=\frac{c_s q_n}{q_s}} < \Pi_n^{II*} = \Pi_n^{II}|_{w^{II*}=c_s + q_n - q_s} = 0$ . Hence, the NBM will not be profitable from selling her NB product to the retailer, and the retailer will carry SB only.  $\square$

*Proof.* **Corollary 1.** The results follow directly from differentiation on  $\hat{\Pi}_n^*$  ( $\hat{\Pi}_r^*$ ) with respect to  $q_n, c_s, c_n$ , and  $q_s$ , respectively.  $\square$

*Proof.* **Lemma 2.** Lemma 1 implies that if  $w \leq c_s^i + q_n - q_s$  and  $T \leq \bar{T}^i(w), \forall i = L, H$ , then such  $(w, T)$  satisfies  $\Pi_r(w, T, c_s^i) \geq \Pi_r^{III}(c_s^i)$ . Next, we want to show that for any  $w \in [0, c_s^L + q_n - q_s]$ ,  $\Delta(w) \stackrel{\text{def}}{=} \bar{T}^H(w) - \bar{T}^L(w) \geq 0$ . The function of  $\Delta(w)$  varies depending on the range of  $w$ .

For any  $0 \leq w \leq \frac{c_s^L q_n}{q_s}$ , we also have  $w < \frac{c_s^H q_n}{q_s}$  due to  $c_s^L \leq c_s^H$ . Then  $\Delta(w) = \bar{T}^{IH}(w) - \bar{T}^{IL}(w) = \frac{(q_s - c_s^L)^2 - (q_s - c_s^H)^2}{4q_s} \geq 0$ .

For any  $\frac{c_s^L q_n}{q_s} < w \leq c_s^L + q_n - q_s$ , we consider the following two cases:

(1) If  $c_s^L + q_n - q_s \leq \frac{c_s^H q_n}{q_s}$ , then we have  $\frac{c_s^L q_n}{q_s} < w \leq c_s^L + q_n - q_s \leq \frac{c_s^H q_n}{q_s} < c_s^H + q_n - q_s$  due to  $q_n > q_s > c_s^H$ . Therefore,  $\Delta(w) = \bar{T}^{IH}(w) - \bar{T}^{ILL}(w) = \frac{(q_n - w)^2}{4q_n} - \frac{(q_s - c_s^H)^2}{4q_s} - \frac{(c_s^L - w + q_n - q_s)^2}{4(q_n - q_s)}$ . Since  $\frac{\partial \Delta}{\partial w} = \frac{c_s^L q_n - q_s w}{2q_n^2 - 2q_n q_s} < 0, \forall w > \frac{c_s^L q_n}{q_s}$  and  $\Delta|_{w=c_s^L + q_n - q_s} = \frac{(q_s - c_s^L)^2}{4q_n} - \frac{(q_s - c_s^H)^2}{4q_s} > 0$ , we have  $\Delta(w) > 0, \forall w \in (\frac{c_s^L q_n}{q_s}, c_s^L + q_n - q_s]$ .

(2) If  $\frac{c_s^H q_n}{q_s} < c_s^L + q_n - q_s$ , then we have  $\frac{c_s^L q_n}{q_s} < \frac{c_s^H q_n}{q_s} < c_s^L + q_n - q_s < c_s^H + q_n - q_s$ . Given any  $\frac{c_s^L q_n}{q_s} < w \leq \frac{c_s^H q_n}{q_s}$ , we have  $\Delta(w) = \bar{T}^{IH}(w) - \bar{T}^{ILL}(w)$  and  $\frac{\partial \Delta}{\partial w} < 0, \forall w > \frac{c_s^L q_n}{q_s}$ . In conjunction with  $\Delta|_{w=\frac{c_s^H q_n}{q_s}} = \frac{(q_s - c_s^H)^2(q_n - q_s)^2 - (c_s^L q_s + q_n q_s - q_s^2 - c_s^H q_n)^2}{4(q_n - q_s)q_s^2} > 0$ , we have  $\Delta(w) > 0, \forall w \in (\frac{c_s^L q_n}{q_s}, \frac{c_s^H q_n}{q_s}]$ . Moreover, for any  $w \in$

$(\frac{c_s^H q_n}{q_s}, c_s^L + q_n - q_s]$ , we again have  $\Delta(w) = \bar{T}^{IIH}(w) - \bar{T}^{IIL}(w) = \frac{(c_s^H - c_s^L)(c_s^H + c_s^L + 2q_n - 2q_s - 2w)}{4(q_n - q_s)} \geq 0$  due to  $c_s^L \leq c_s^H$ .

In summary, we have shown that  $\bar{T}^H(w) \geq \bar{T}^L(w), \forall w \in [0, c_s^L + q_n - q_s]$ . Therefore, for any  $(w^L, T^L)$  that satisfies (IRL), it follows that  $w^L \leq c_s^L + q_n - q_s < c_s^H + q_n - q_s$  and  $T^L \leq \bar{T}^L(w^L) < \bar{T}^H(w^L)$ , which implies that such  $(w^L, T^L)$  satisfies  $\Pi_r(w^L, T^L, c_s^H) \geq \Pi_r^{III}(c_s^H)$  as well. Together with (ICH), we have  $\Pi_r(w^H, T^H, c_s^H) \stackrel{(ICH)}{\geq} \Pi_r(w^L, T^L, c_s^H) \geq \Pi_r^{III}(c_s^H)$ .  $\square$

*Proof.* **Lemma 3.** The proof is embedded in the paragraph right above Lemma 3 in the main body, thus it is omitted here.  $\square$

*Proof.* **Lemma 4.** To prove the result here is equivalent to show that under the  $(H^{II}, L^I)$  contract, (ICH), (ICL), (IRL), and  $T^H \geq 0$  cannot be simultaneously satisfied. By offering a  $(H^{II}, L^I)$  contract, the NBM guides the high-type retailer to carry both brands, and the low-type retailer to carry NB only. In addition, it implies that  $(w^H, T^H)$  and  $(w^L, T^L)$  must satisfy  $\frac{c_s^H q_n}{q_s} < w^H \leq c_s^H + q_n - q_s, T^H \leq \bar{T}^{IIH}(w^H), w^L \leq \frac{c_s^L q_n}{q_s}$ , and  $T^L \leq \bar{T}^{IIL}(w^L)$ . Lemma 1 implies that if a high-type retailer lies about his type by choosing the  $L^I$  contract, he will carry NB only, i.e.,  $\Pi_r(w^L, T^L, c_s^H) \equiv \Pi_r^I(w^L, T^L, c_s^H)$ . Hence, (ICH) can be equivalently written as  $\Pi_r^{II}(w^H, T^H, c_s^H) \geq \Pi_r^I(w^L, T^L, c_s^H)$ . Together with (IRL), we have  $T^H \leq \frac{q_n - w^H}{2} [\frac{1}{2} - \frac{w^H - c_s^H}{2(q_n - q_s)}] + \frac{q_s - c_s^H}{2} [\frac{w^H - c_s^H}{2(q_n - q_s)} - \frac{c_s^H}{2q_s}] - \frac{(q_s - c_s^L)^2}{4q_s} \stackrel{def}{=} \hat{T}^H(w^H)$ , which is a decreasing function in  $w^H$ .

If  $c_s^L + q_n - q_s < \frac{c_s^H q_n}{q_s}$ , then  $T^H \leq \hat{T}^H(\frac{c_s^H q_n}{q_s}) = \frac{q_n(q_s - c_s^H)^2 - (q_s - c_s^L)^2 q_s}{4q_s^2} < 0$ , which contradicts with  $T^H \geq 0$ . If  $\frac{c_s^H q_n}{q_s} < c_s^L + q_n - q_s$  and  $w^H \leq c_s^L + q_n - q_s$ , then Lemma 1 implies that if the low-type retailer falsely chooses  $H^I$  contract, he will carry both brands, i.e.,  $\Pi_r(w^H, T^H, c_s^L) \equiv \Pi_r^{II}(w^H, T^H, c_s^L)$ . In order to satisfy (ICL), i.e.,  $\Pi_r^I(w^L, T^L, c_s^L) \geq \Pi_r^{II}(w^H, T^H, c_s^L)$ ,  $T^H$  has to satisfy  $T^H \geq \frac{q_n - w^H}{2} [\frac{1}{2} - \frac{w^H - c_s^L}{2(q_n - q_s)}] + \frac{q_s - c_s^L}{2} [\frac{w^H - c_s^L}{2(q_n - q_s)} - \frac{c_s^L}{2q_s}] - \frac{(q_s - c_s^L)^2}{4q_s} > \hat{T}^H$ , which contradicts with  $T^H \leq \hat{T}^H$ . In this scenario, a  $(H^{II}, L^I)$  contract cannot simultaneously satisfy (ICH), (IRL) and (ICL), thus it is infeasible. If  $\frac{c_s^H q_n}{q_s} < c_s^L + q_n - q_s$  and  $w^H > c_s^L + q_n - q_s$ , then  $T^H \leq \hat{T}^H(w^H) < \hat{T}^H(c_s^L + q_n - q_s) = \frac{(c_s^H - c_s^L)(c_s^H q_n + c_s^L q_n - 2(c_s^L + q_n - q_s)q_s)}{4(q_n - q_s)q_s} \leq 0$ , which again contradicts with  $T^H \geq 0$ .  $\square$

*Proof.* **Lemma 5.** Let  $\Pi_n^{SD*}$  and  $\Pi_n^{NSD*}$  represent NBM's optimal profits from contracts with and without shutdown, respectively. Recall from Proposition 1 that  $\Pi_n^{SD*}$  is equal to  $v\bar{T}^{IH}(c_n)$  if  $c_n \leq \frac{c_s^H q_n}{q_s}$ , or  $\Pi_n^{SD*} = v\bar{T}^{IIH}(c_n)$  if  $\frac{c_s^H q_n}{q_s} < c_n \leq c_s^H + q_n - q_s$ .

(i) If  $\tilde{c}_n < \frac{c_s^L q_n}{q_s}$ , the optimal contract without shutdown is  $(H^I, L^{II})$  with  $(w^{H*}, w^{L*}) = (c_n, c_s^L + q_n - q_s)$ . Under this contract,  $\Pi_n^{NSD*}$  is strictly less than  $\Pi_n^{SD*}$ . Now suppose  $\tilde{c}_n > \frac{c_s^L q_n}{q_s}$ . Let  $\delta \stackrel{def}{=} \Pi_n^{SD*} - \Pi_n^{NSD*}$ . We can show that  $\delta$  is increasing in  $c_n, \forall c_n \in (0, q_n)$ . Therefore, there exists a unique  $\bar{c}_n$  such that  $\Pi_n^{SD*}(\bar{c}_n) = \Pi_n^{NSD*}(\bar{c}_n)$ . For any  $c_n < \bar{c}_n, \Pi_n^{SD*}(c_n) < \Pi_n^{NSD*}(c_n)$ , and for any  $c_n \geq \bar{c}_n, \Pi_n^{SD*}(c_n) \geq \Pi_n^{NSD*}(c_n)$ .

(ii) Similar to above, we can prove that  $\delta$  is decreasing in  $c_s^L$ . Suppose  $c_s^L$  increases from  $\hat{c}_s^L$  to  $\check{c}_s^L$ . Following (i), there are unique  $\hat{c}_n$  and  $\check{c}_n$  such that  $\delta(c_n = \hat{c}_n | c_s^L = \hat{c}_s^L) = 0$ , and  $\delta(c_n = \check{c}_n | c_s^L = \check{c}_s^L) = 0$ . Due to  $\hat{c}_s^L \leq \check{c}_s^L, \delta(c_n = \check{c}_n | c_s^L = \hat{c}_s^L) \geq \delta(c_n = \check{c}_n | c_s^L = \check{c}_s^L) = 0 = \delta(c_n = \hat{c}_n | c_s^L = \hat{c}_s^L)$ . Since  $\delta$  is increasing in  $c_n$ , we have  $\check{c}_n \geq \hat{c}_n$ . Likewise, we can also show that  $\bar{c}_n$  is decreasing in  $c_s^H$ .  $\square$

*Proof.* **Proposition 2.** (i) Suppose  $\frac{c_s^L q_n}{q_s} \leq c_n < \bar{c}_n$ . Then, NBM will offer a contract without shutdown to the retailer. By substituting  $T^H$  from Table 1 into Equation (5), we can obtain detailed forms for  $\Pi_n$ , defined as below:

$$\Pi_n(w^H, w^L) = \begin{cases} \Pi_n^{(1)}(w^H, w^L), & \text{if offering}(H^I, L^{II}) \ \& \ w^L \leq \frac{c_s^H q_n}{q_s}, \\ \Pi_n^{(2)}(w^H, w^L), & \text{if offering}(H^I, L^{II}) \ \& \ \frac{c_s^H q_n}{q_s} < w^L \leq c_s^L + q_n - q_s, \\ \Pi_n^{(3)}(w^H, w^L), & \text{if offering}(H^{II}, L^{II}) \ \& \ w^L \leq \frac{c_s^H q_n}{q_s}, \\ \Pi_n^{(4)}(w^H, w^L), & \text{if offering}(H^{II}, L^{II}) \ \& \ \frac{c_s^H q_n}{q_s} < w^L \leq c_s^L + q_n - q_s. \end{cases}$$

Differentiation of  $\Pi_n(w^H, w^L)$  with respect to  $w^H$  and  $w^L$  yields:

$$\begin{aligned} \frac{\partial \Pi_n^{(1)}}{\partial w^H} &= \frac{\partial \Pi_n^{(2)}}{\partial w^H} = \frac{v(c_n - w^H)}{2q_n}, \quad \frac{\partial^2 \Pi_n^{(1)}}{\partial w^{H^2}} = \frac{\partial^2 \Pi_n^{(2)}}{\partial w^{H^2}} = -\frac{v}{2q_n} < 0, \\ \frac{\partial \Pi_n^{(3)}}{\partial w^H} &= \frac{\partial \Pi_n^{(4)}}{\partial w^H} = \frac{v(c_n - w^H)}{2(q_n - q_s)}, \quad \frac{\partial^2 \Pi_n^{(3)}}{\partial w^{H^2}} = \frac{\partial^2 \Pi_n^{(4)}}{\partial w^{H^2}} = -\frac{v}{2(q_n - q_s)} < 0, \\ \frac{\partial \Pi_n^{(1)}}{\partial w^L} &= \frac{\partial \Pi_n^{(3)}}{\partial w^L} = \frac{q_n(c_n - vc_n - vc_s^L) - w^L(q_n - vq_n - vq_s)}{2q_n(q_n - q_s)}, \quad \frac{\partial^2 \Pi_n^{(1)}}{\partial w^{L^2}} = \frac{\partial^2 \Pi_n^{(3)}}{\partial w^{L^2}} = -\frac{q_n - vq_n - vq_s}{2q_n(q_n - q_s)}, \\ \frac{\partial \Pi_n^{(2)}}{\partial w^L} &= \frac{\partial \Pi_n^{(4)}}{\partial w^L} = \frac{(1-v)c_n + v(c_s^H - c_s^L) - (1-v)w^L}{2(q_n - q_s)}, \quad \frac{\partial^2 \Pi_n^{(2)}}{\partial w^{L^2}} = \frac{\partial^2 \Pi_n^{(4)}}{\partial w^{L^2}} = -\frac{1-v}{2(q_n - q_s)} < 0. \end{aligned}$$

Hence,  $\Pi_n$  is concave in  $w^H$  regardless of its contract forms.  $\Pi_n^{(2)}$  and  $\Pi_n^{(4)}$  are concave in  $w^L$  and the interior optimal  $w^{L*}$  is  $c_n + \frac{v(c_s^H - c_s^L)}{1-v}$ . Whether  $\Pi_n^{(1)}$  and  $\Pi_n^{(3)}$  are concave in  $w^L$  depends on the sign of  $q_n - vq_n - vq_s$ . If  $q_n - vq_n - vq_s \geq 0$ , then  $\Pi_n^{(1)}$  and  $\Pi_n^{(3)}$  are concave in  $w^L$ , and the interior optimal  $w^{L*}$  is  $\frac{q_n(c_n - vc_n - vc_s^L)}{q_n - vq_n - vq_s}$ .

We compare the NBM's expected profits from  $(H^I, L^{II})$  and  $(H^{II}, L^{II})$  under the following three parameter settings: (1)  $c_s^L + q_n - q_s < \frac{c_s^H q_n}{q_s}$  and  $q_n - vq_n - vq_s \geq 0$ , (2)  $\frac{c_s^H q_n}{q_s} \leq c_s^L + q_n - q_s$  and  $q_n - vq_n - vq_s \geq 0$ , (3)  $\frac{c_s^H q_n}{q_s} < c_s^L + q_n - q_s$  and  $q_n - vq_n - vq_s < 0$ . Note that the condition of  $\frac{c_s^L q_n}{q_s} \leq c_n < \bar{c}_n$  cannot be met if  $c_s^L + q_n - q_s < \frac{c_s^H q_n}{q_s}$  and  $q_n - vq_n - vq_s < 0$ , thus this parameter setting is not discussed here.

**Parameter setting 1:**  $c_s^L + q_n - q_s < \frac{c_s^H q_n}{q_s}$  and  $q_n - vq_n - vq_s \geq 0$

Under this parameter setting, a feasible  $w^L$  automatically satisfies  $w^L \leq \frac{c_s^H q_n}{q_s}$ , regardless of the form of contract offered. Furthermore,  $\Pi_n^{(1)}$  and  $\Pi_n^{(3)}$  are concave in  $w^L$ . We also have  $\bar{c}_n < c_s^L + q_n - q_s < \frac{c_s^H q_n}{q_s}$ . Given  $\frac{c_s^H q_n}{q_s} \leq c_n < \bar{c}_n$ , the respective optimal  $(w^{H*}, w^{L*})$  that maximizes  $\Pi_n^{(1)}(w^H, w^L)$  and  $\Pi_n^{(3)}(w^H, w^L)$  are  $(c_n, \frac{q_n(c_n - vc_n - vc_s^L)}{q_n - vq_n - vq_s})$  and  $(\frac{c_s^H q_n}{q_s}, \frac{q_n(c_n - vc_n - vc_s^L)}{q_n - vq_n - vq_s})$ .  $\Pi_n^{(1)*} - \Pi_n^{(3)*} = \frac{v(c_s^H q_n - c_n q_s)^2}{4q_n q_s^2} \geq 0$ . Thus,  $(H^I, L^{II})$  contract is optimal in this case.

**Parameter setting 2:**  $\frac{c_s^H q_n}{q_s} \leq c_s^L + q_n - q_s$  and  $q_n - vq_n - vq_s \geq 0$

Under this parameter setting,  $\Pi_n^{(1)}$  and  $\Pi_n^{(3)}$  are concave in  $w^L$ . In order to distinguish the feasible boundary for  $w^H$  and  $w^L$  according to Lemma 1, we further recognize two cases within this parameter setting: (i)  $\frac{c_s^H q_n}{q_s} \leq \tilde{c}_n$ , (ii)  $\tilde{c}_n < \frac{c_s^H q_n}{q_s}$ . We present the optimal  $(w^H, w^L)$  for each contract form under these two cases in the Tables B1 and B2 below.

Substituting  $(w^{H*}, w^{L*})$  into the corresponding  $\Pi_n$  functions and then comparing all  $\Pi_n^{(i)}, i \in (1, 2, 3, 4)$ , under each  $c_n$  interval, we obtain the following results: if  $\frac{c_s^L q_n}{q_s} < c_n \leq c_n^{(1)}$  (where  $c_n^{(1)} = \frac{c_s^H q_n}{q_s} - \frac{v(c_s^H - c_s^L)}{1-v}$ ), offering a  $(H^I, L^{II} : w^L \leq \frac{c_s^H q_n}{q_s})$  contract is most profitable for NBM; if  $c_n^{(1)} < c_n \leq \frac{c_s^H q_n}{q_s}$ , it is best for the NBM to offer a  $(H^I, L^{II} : \frac{c_s^H q_n}{q_s} < w^L \leq c_s^L + q_n - q_s)$  contract; if  $\frac{c_s^H q_n}{q_s} < c_n \leq \tilde{c}_n$ , then a  $(H^{II}, L^{II} : \frac{c_s^H q_n}{q_s} < w^L \leq c_s^L + q_n - q_s)$  contract is optimal for the NBM.

| $c_n$ interval:                                                         |          | $\frac{c_s^L q_n}{q_s} < c_n \leq c_n^{(1)}$              | $c_n^{(1)} < c_n \leq \frac{c_s^H q_n}{q_s}$ | $\frac{c_s^H q_n}{q_s} < c_n < \tilde{c}_n$ |
|-------------------------------------------------------------------------|----------|-----------------------------------------------------------|----------------------------------------------|---------------------------------------------|
| $(H^I, L^{II} : w^L \leq \frac{c_s^H q_n}{q_s})$                        | $w^{H*}$ | $C_n$                                                     | $C_n$                                        | $\frac{c_s^H q_n}{q_s}$                     |
|                                                                         | $w^{L*}$ | $\frac{(c_n - v c_n - v c_s^L) q_n}{q_n - v q_n - v q_s}$ | $\frac{c_s^H q_n}{q_s}$                      | $\frac{c_s^H q_n}{q_s}$                     |
| $(H^I, L^{II} : \frac{c_s^H q_n}{q_s} < w^L \leq c_s^L + q_n - q_s)$    | $w^{H*}$ | $C_n$                                                     | $C_n$                                        | $\frac{c_s^H q_n}{q_s}$                     |
|                                                                         | $w^{L*}$ | $\frac{c_s^H q_n}{q_s}$                                   | $C_n + \frac{v(c_s^H - c_s^L)}{1-v}$         | $C_n + \frac{v(c_s^H - c_s^L)}{1-v}$        |
| $(H^{II}, L^{II} : w^L \leq \frac{c_s^H q_n}{q_s})$                     | $w^{H*}$ | $\frac{c_s^H q_n}{q_s}$                                   | $\frac{c_s^H q_n}{q_s}$                      | $C_n$                                       |
|                                                                         | $w^{L*}$ | $\frac{(c_n - v c_n - v c_s^L) q_n}{q_n - v q_n - v q_s}$ | $\frac{c_s^H q_n}{q_s}$                      | $\frac{c_s^H q_n}{q_s}$                     |
| $(H^{II}, L^{II} : \frac{c_s^H q_n}{q_s} < w^L \leq c_s^L + q_n - q_s)$ | $w^{H*}$ | $\frac{c_s^H q_n}{q_s}$                                   | $\frac{c_s^H q_n}{q_s}$                      | $C_n$                                       |
|                                                                         | $w^{L*}$ | $\frac{c_s^H q_n}{q_s}$                                   | $C_n + \frac{v(c_s^H - c_s^L)}{1-v}$         | $C_n + \frac{v(c_s^H - c_s^L)}{1-v}$        |

Table B1 Parameter Setting 2: (i)  $\frac{c_s^H q_n}{q_s} < \tilde{c}_n$

(Note: The global optimal  $(w^H, w^L)$  under each  $c_n$  interval is highlighted in gray; the same style is used in Table B2 and Table B3.)

| $c_n$ interval:                                                         |          | $\frac{c_s^L q_n}{q_s} < c_n \leq c_n^{(1)}$              | $c_n^{(1)} < c_n \leq \tilde{c}_n$   |
|-------------------------------------------------------------------------|----------|-----------------------------------------------------------|--------------------------------------|
| $(H^I, L^{II} : w^L \leq \frac{c_s^H q_n}{q_s})$                        | $w^{H*}$ | $C_n$                                                     | $C_n$                                |
|                                                                         | $w^{L*}$ | $\frac{(c_n - v c_n - v c_s^L) q_n}{q_n - v q_n - v q_s}$ | $\frac{c_s^H q_n}{q_s}$              |
| $(H^I, L^{II} : \frac{c_s^H q_n}{q_s} < w^L \leq c_s^L + q_n - q_s)$    | $w^{H*}$ | $C_n$                                                     | $C_n$                                |
|                                                                         | $w^{L*}$ | $\frac{c_s^H q_n}{q_s}$                                   | $C_n + \frac{v(c_s^H - c_s^L)}{1-v}$ |
| $(H^{II}, L^{II} : w^L \leq \frac{c_s^H q_n}{q_s})$                     | $w^{H*}$ | $\frac{c_s^H q_n}{q_s}$                                   | $\frac{c_s^H q_n}{q_s}$              |
|                                                                         | $w^{L*}$ | $\frac{(c_n - v c_n - v c_s^L) q_n}{q_n - v q_n - v q_s}$ | $\frac{c_s^H q_n}{q_s}$              |
| $(H^{II}, L^{II} : \frac{c_s^H q_n}{q_s} < w^L \leq c_s^L + q_n - q_s)$ | $w^{H*}$ | $\frac{c_s^H q_n}{q_s}$                                   | $\frac{c_s^H q_n}{q_s}$              |
|                                                                         | $w^{L*}$ | $\frac{c_s^H q_n}{q_s}$                                   | $C_n + \frac{v(c_s^H - c_s^L)}{1-v}$ |

Table B2 Parameter Setting 2: (ii)  $\tilde{c}_n < \frac{c_s^H q_n}{q_s}$

**Parameter setting 3:**  $\frac{c_s^H q_n}{q_s} < c_s^L + q_n - q_s$  and  $q_n - v q_n - v q_s < 0$

When  $q_n - v q_n - v q_s < 0$ ,  $\Pi_n^{(1)}$  and  $\Pi_n^{(3)}$  are convex in  $w^L$ , thus the maximum exists at the boundary of  $w^L$ . Given  $c_n > \frac{c_s^L q_n}{q_s}$ ,  $\Pi_n^{(1)}$  and  $\Pi_n^{(3)}$  are both increasing in  $w^L$ . Consequently, both  $\Pi_n^{(1)}$  and  $\Pi_n^{(3)}$  are maximized at  $w^L = \frac{c_s^H q_n}{q_s}$ . In addition, both  $\Pi_n^{(2)}$  and  $\Pi_n^{(4)}$  are maximized at their respective interior optimal  $w^L = c_n + \frac{v(c_s^H - c_s^L)}{1-v}$  under the condition  $\frac{c_s^L q_n}{q_s} \leq c_n < \tilde{c}_n$ . We list the optimal  $(w^H, w^L)$  for each contract form under two cases in Table B3.

| Two cases:                                                              |          | if $\tilde{c}_n < \frac{c_s^H q_n}{q_s}$       | if $\frac{c_s^H q_n}{q_s} < \tilde{c}_n$                 |                                             |
|-------------------------------------------------------------------------|----------|------------------------------------------------|----------------------------------------------------------|---------------------------------------------|
| $c_n$ interval:                                                         |          | $\frac{c_s^L q_n}{q_s} < c_n \leq \tilde{c}_n$ | $\frac{c_s^L q_n}{q_s} < c_n \leq \frac{c_s^H q_n}{q_s}$ | $\frac{c_s^H q_n}{q_s} < c_n < \tilde{c}_n$ |
| $(H^I, L^{II} : w^L \leq \frac{c_s^H q_n}{q_s})$                        | $w^{H*}$ | $c_n$                                          | $c_n$                                                    | $\frac{c_s^H q_n}{q_s}$                     |
|                                                                         | $w^{L*}$ | $\frac{c_s^H q_n}{q_s}$                        | $\frac{c_s^H q_n}{q_s}$                                  | $\frac{c_s^H q_n}{q_s}$                     |
| $(H^I, L^{II} : \frac{c_s^H q_n}{q_s} < w^L \leq c_s^L + q_n - q_s)$    | $w^{H*}$ | $c_n$                                          | $c_n$                                                    | $\frac{c_s^H q_n}{q_s}$                     |
|                                                                         | $w^{L*}$ | $c_n + \frac{v(c_s^H - c_s^L)}{1-v}$           | $c_n + \frac{v(c_s^H - c_s^L)}{1-v}$                     | $c_n + \frac{v(c_s^H - c_s^L)}{1-v}$        |
| $(H^{II}, L^{II} : w^L \leq \frac{c_s^H q_n}{q_s})$                     | $w^{H*}$ | $\frac{c_s^H q_n}{q_s}$                        | $\frac{c_s^H q_n}{q_s}$                                  | $c_n$                                       |
|                                                                         | $w^{L*}$ | $\frac{c_s^H q_n}{q_s}$                        | $\frac{c_s^H q_n}{q_s}$                                  | $\frac{c_s^H q_n}{q_s}$                     |
| $(H^{II}, L^{II} : \frac{c_s^H q_n}{q_s} < w^L \leq c_s^L + q_n - q_s)$ | $w^{H*}$ | $\frac{c_s^H q_n}{q_s}$                        | $\frac{c_s^H q_n}{q_s}$                                  | $c_n$                                       |
|                                                                         | $w^{L*}$ | $c_n + \frac{v(c_s^H - c_s^L)}{1-v}$           | $c_n + \frac{v(c_s^H - c_s^L)}{1-v}$                     | $c_n + \frac{v(c_s^H - c_s^L)}{1-v}$        |

Table B3 Parameter Setting 3

We again substitute  $(w^{H*}, w^{L*})$  into the respective  $\Pi_n^{(i)}, i \in (1, 2, 3, 4)$ . The comparison among all  $\Pi_n^{(i)*}$  under each  $c_n$  interval reveals the following result: if  $\frac{c_s^L q_n}{q_s} < c_n \leq \frac{c_s^H q_n}{q_s}$ , it is most profitable for the NBM to offer a  $(H^I, L^{II} : \frac{c_s^H q_n}{q_s} < w^L \leq c_s^L + q_n - q_s)$  contract; otherwise, i.e.,  $\frac{c_s^H q_n}{q_s} < c_n \leq \tilde{c}_n$ , then it is best for NBM to offer a  $(H^{II}, L^{II} : \frac{c_s^H q_n}{q_s} < w^L \leq c_s^L + q_n - q_s)$  contract.

Summarizing the results from all three parameter settings above, we obtain that if  $\frac{c_s^L q_n}{q_s} \leq c_n < \bar{c}_n$ ,  $(H^*, L^*)$  is given by

$$(H^*, L^*) = \begin{cases} (H^I, L^{II}), & \text{if } c_n < \frac{c_s^H q_n}{q_s} \\ (H^{II}, L^{II}), & \text{if } c_n \geq \frac{c_s^H q_n}{q_s}. \end{cases}$$

(ii) Remark that if  $c_n \geq \bar{c}_n$ , then NBM prefers to offer a contract with shutdown, i.e., offering the first-best contract to H-type retailer and offering nothing to the L-type retailer. According to Proposition 1, the form of the H-type contract depends on the value of  $c_n$ : if  $c_n < \frac{c_s^H q_n}{q_s}$ , then a  $H^I$  contract will be offered; otherwise, a  $H^{II}$  contract will be offered.  $\square$

*Proof.* **Corollary 2.** The proof is embedded in the proof of Proposition 2 and main body of the paper, thus omitted here.  $\square$

*Proof.* **Proposition 3.** If  $\frac{c_s^L q_n}{q_s} \leq c_n < \bar{c}_n$ , then a contract without shutdown is offered.

(i) Suppose the parameter  $q_n$  increases to  $\hat{q}_n$ . By substituting  $T^H$  in Table 1 into equation (5) and after some algebra, we can show that for any given contracts without shutdown,  $\Pi_n$  increases in  $q_n$ . Therefore, for any given  $(w^H, w^L)$ , we show  $\Pi_n(w^H, w^L|q_n) \leq \Pi_n(w^H, w^L|\hat{q}_n)$  for any  $q_n \leq \hat{q}_n$ . Let  $(w^{H*}, w^{L*})$  and  $(\hat{w}^{H*}, \hat{w}^{L*})$  be the optimal contracts of  $(w^H, w^L)$  for given  $q_n$  and  $\hat{q}_n$ , respectively. Since  $(\hat{w}^{H*}, \hat{w}^{L*})$  is the optimal solution for NBM with parameter  $\hat{q}_n$ ,  $\Pi_n(w^{H*}, w^{L*}|\hat{q}_n) \leq \Pi_n(\hat{w}^{H*}, \hat{w}^{L*}|\hat{q}_n)$ . Hence, we show  $\Pi_n(w^{H*}, w^{L*}|q_n) \leq \Pi_n(\hat{w}^{H*}, \hat{w}^{L*}|\hat{q}_n)$ .

Similarly, we can prove that the NBM's expected optimal profit  $\Pi_n^*$  decreases in  $q_s$ .

(ii) The L-type retailer's equilibrium profit is his reservation profit  $\Pi_r^{III*}(c_s^L)$ , which is increasing in  $q_s$  and independent from  $q_n$ .

(iii) When a contract without shutdown is offered, direct differentiation of  $\Pi_r^{H*}$  w.r.t.  $q_n$  yields the following results: if a  $(H^I, L^{II} : w^L \leq \frac{c_s^H q_n}{q_s})$  contract is optimal, then  $\frac{d\Pi_r^{H*}}{dq_n} = \frac{v(1-v)^2(c_n q_s - c_s^L q_n) \{c_n [(2q_n^2 - q_n q_s)(1-v) - v q_s^2] - c_s^L q_n (q_n + v q_n - 3v q_s)\}}{4(q_n - q_s)^2 (q_n (1-v) - v q_s)^3}$ ; otherwise, i.e., any other contract form in Tables 5, 6, or 7 is optimal, then  $\frac{d\Pi_r^{H*}}{dq_n} = \frac{v(c_s^H - c_s^L)(2c_n(1-v) - c_s^H + 3v c_s^H - c_s^L - v c_s^L)}{4(1-v)(q_n - q_s)^2}$ . If a contract with shutdown is offered, then  $\Pi_r^{H*}$  is irrelevant to  $q_n$ . After some algebra, we can show that  $\frac{d\Pi_r^{H*}}{dq_n} \geq 0$  under all possible parameter settings in Proposition 2.

In addition, we obtain numerical evidence that  $\Pi_r^{H*}$  may increase or decrease in  $q_s$ . Suppose  $c_n = 0.493$ ,  $q_n = 1.155$ ,  $c_s^H = 0.346$ ,  $c_s^L = 0.248$ ,  $v = 0.594$ . When  $q_s$  increases from 0.582 to 0.61 to 0.627,  $\Pi_r^H$  first increases from 0.0479 to 0.0511 then decreases to 0.0493.

(iv) It follows from part (ii) and (iii) that  $\Pi_r^*$  is increasing in  $q_n$ . Moreover, our numerical experiment shows that  $\Pi_r^*$  may increase or decrease in  $q_s$ . Suppose  $c_n = 0.55$ ,  $q_n = 1.125$ ,  $c_s^H = 0.35$ ,  $c_s^L = 0.26$ ,  $v = 0.63$ . When  $q_s$  increases from 0.532 to 0.55 to 0.559,  $\Pi_r$  first increases from 0.0348 to 0.0367 then decreases to 0.0358.  $\square$

*Proof.* **Proposition 4.** The proof for (i) and (ii) are similar to the proof of Proposition 3 (i)-(ii), thus it is omitted here.

(iii) If  $\frac{c_s^L q_n}{q_s} \leq c_n < \bar{c}_n$  (i.e., a contract without shutdown is offered), direct differentiation of  $\Pi_r^{H*}$  w.r.t.  $c_n$  yields the following results: if a  $(H^I, L^{II} : w^L \leq \frac{c_s^H q_n}{q_s})$  contract is optimal, then  $\frac{d\Pi_r^{H*}}{dc_n} = \frac{-v(1-v)^2 q_n (c_n q_s - c_s^L q_n)}{2(q_n - q_s)(q_n(1-v) - v q_s)^2} \leq 0$ ; otherwise, i.e., any other contract form is optimal, then  $\frac{d\Pi_r^{H*}}{dc_n} = \frac{-v(c_s^H - c_s^L)}{2(q_n - q_s)} \leq 0$ . If a  $(H^I, L^{II} : w^L \leq \frac{c_s^H q_n}{q_s})$  contract is offered, then  $\Pi_r^{H*}$  is irrelevant to  $c_s^H$ . Otherwise, i.e., any other without-shutdown contract form is optimal,  $\frac{d\Pi_r^{H*}}{dc_s^H} = \frac{-v(2v q_s (c_s^H - c_s^L) + (1-v)(c_n q_s - c_s^H q_n))}{2q_s (q_n - q_s)(1-v)}$ , which can be shown to be negative with some algebra.

Furthermore, our numerical experiment below illustrates that  $\Pi_r^{H*}$  may increase or decrease in  $c_s^L$ . Suppose  $c_n = 19.54$ ,  $q_n = 59.6$ ,  $c_s^H = 11.27$ ,  $q_s = 19.07$ ,  $v = 0.7$ . When  $c_s^L$  increases from 4.8 to 5.4 to 6.1,  $\Pi_r^{H*}$  first increases from 2.037 to 2.232 then decreases to 2.198.

(iv) It follows from part (ii) and (iii) that  $\Pi_r^*$  is decreasing in  $c_n$  and  $c_s^H$ . Furthermore, our numerical experiment show that  $\Pi_r^*$  may increase or decrease in  $c_s^L$ . Use the same example above in (iii), when  $c_s^L$  increases from 4.8 to 5.4 to 6.1,  $\Pi_r^*$  first increases from 2.2264 to 2.2972 then decreases to 2.2004.  $\square$

*Proof.* **Proposition 5.** (i) If a  $(H^I, L^{II} : w^L \leq \frac{c_s^H q_n}{q_s})$  contract is optimal, then  $\frac{dV_n}{dc_s^H} = \frac{v(q_s - c_s^H)}{2q_s} \geq 0$ . Otherwise, if any other without-shutdown contract form is offered, then with some algebra, we have  $\frac{dV_n}{dc_s^H} = \frac{v((1-v)(c_s^H + q_n - q_s - c_n) - v(c_s^H - c_s^L))}{2(1-v)(q_n - q_s)} \geq 0$ . If a contract with shutdown is offered, then  $V_n$  becomes irrelevant to  $c_s^H$ . Thus,  $V_n$  is increasing (non-decreasing) in  $c_s^H$  overall.

Similarly, if a  $(H^I, L^{II} : w^L \leq \frac{c_s^H q_n}{q_s})$  contract is optimal, then  $\frac{dV_n}{dc_s^L} = \frac{v[c_n q_n (1-v) - c_s^L (q_n - v q_s) - (q_n - q_s)((1-v)q_n - v q_s)]}{2(q_n - q_s)((1-v)q_n - v q_s)} < 0$ . Otherwise, if any other without-shutdown contract form is offered, we have  $\frac{dV_n}{dc_s^L} = \frac{v[v(c_s^H + q_n - q_s - c_n) + c_n - c_s^L - q_n + q_s]}{2(1-v)(q_n - q_s)} < 0$ . Otherwise, if  $\bar{c}_n < c_n \leq c_s^L + q_n - q_s$ ,  $\frac{dV_n}{dc_s^L} = \frac{(1-v)(c_s^L + q_n - q_s - c_n)}{2(q_n - q_s)} \geq 0$ ; if  $c_n > c_s^L + q_n - q_s$ , then  $V_n$  becomes 0 and is irrelevant to  $c_s^L$ . Thus,  $V_n$  may increase or decrease in  $c_s^L$ .

(ii)  $|V_r^L| = 0$ , thus is independent from any parameter.

(iii) Our numerical experiments below demonstrate that  $|V_r^H|$  may increase or decrease in  $c_s^H$  and  $c_s^L$ , respectively.

**Example for  $c_s^H$ :** Suppose  $c_n = 14.49$ ,  $q_n = 75.5$ ,  $c_s^L = 3.64$ ,  $q_s = 19.78$ ,  $v = 0.81$ . When  $c_s^H$  increases from 8 to 9.3 to 10.7,  $|V_r^H|$  first increases from 0.9020 to 0.9697 then decreases to 0.9392.

**Example for  $c_s^L$ :** Suppose  $c_n = 14.49$ ,  $q_n = 75.5$ ,  $c_s^H = 10.46$ ,  $q_s = 19.78$ ,  $v = 0.81$ . When  $c_s^L$  increases from 1 to 2.4 to 3.5,  $|V_r^H|$  first increases from 1.5650 to 1.7217 then decreases to 1.6028.

(iv) Since  $|V_r| = |V_r^H|$ ,  $|V_r|$  shares the same properties as those of  $|V_r^H|$ .  $\square$

*Proof.* **Proposition 6.** If a  $(H^I, L^{II} : w^L \leq \frac{c_s^H q_n}{q_s})$  contract is optimal, then  $CS$  is irrelevant to  $c_s^H$ . If  $(H^I, L^{II} : \frac{c_s^H q_n}{q_s} < w^L \leq c_s^L + q_n - q_s)$  contract is optimal, then we have  $\frac{dCS}{dc_s^H} = \frac{v[c_s^H(q_n - q_s - c_n) - (c_s^L + q_n - q_s - c_n)]}{v[c_s^H(q_n - q_s - c_n) - (c_s^L + q_n - q_s - c_n)]} \leq 0$ . If a  $(H^{II}, L^{II} : \frac{c_s^H q_n}{q_s} < w^L \leq c_s^L + q_n - q_s)$  contract is offered, then  $\frac{dCS}{dc_s^H} = \frac{v[c_s^H q_n - q_s(c_s^L + q_n - q_s) + v(q_s - c_s^H)(q_n - q_s)]}{4q_s(1-v)(q_n - q_s)} \leq 0$ . Otherwise, if a contract with shutdown is offered, then  $CS$  behaves like the case under symmetric information, thus it decreases in  $c_s^H$ .

The proof for  $CS$  decreasing in  $c_n$  is similar to the proof above, thus it is omitted here.

Our numerical examples below show that  $CS$  may increase or decrease in  $q_s$  and  $c_s^L$ , respectively.

**Example for  $q_s$ :** Suppose  $c_n = 2.84$ ,  $q_n = 5.34$ ,  $c_s^L = 1.21$ ,  $c_s^H = 2.04$ ,  $v = 0.252$ . When  $q_s$  increases from 2.28 to 2.65 to 3.017,  $CS$  first decreases from 0.1462 to 0.1434 then increases to 0.1491.

**Example for  $c_s^L$ :** Suppose  $c_n = 4.83$ ,  $q_n = 11.55$ ,  $c_s^H = 2.29$ ,  $q_s = 4.78$ ,  $v = 0.424$ . When  $c_s^L$  increases from 0.66 to 1.33 to 1.99,  $CS$  first decreases from 0.4838 to 0.4564 then increases to 0.4879.  $\square$

*Proof.* **Proposition 7.** (i) We first solve the retailer's pricing problem. That is, given any NB retail price  $\tilde{p}_n$  set by the NB manufacturer, the retailer decides whether to introduce SB products and the retail price  $\tilde{p}_s$  for SB products. Note that given  $\tilde{p}_n$  and  $\tilde{p}_s$ , the demands for the NB and SB products  $(\tilde{Q}_n, \tilde{Q}_s)$  are determined according to equation (1). We analyze the retailer's local optimal decisions under Case I, II, III.

**Case I:** If  $\tilde{p}_n \leq \frac{c_s q_n}{q_s}$ , any  $\tilde{p}_s$  higher than  $c_s$  satisfies the condition  $\frac{\tilde{p}_s}{q_s} \geq \frac{\tilde{p}_n - \tilde{p}_s}{q_n - q_s}$ , following which  $\tilde{Q}_s = 0$  and  $\tilde{\Pi}_r = 0$ .

**Case II:** If, given any  $\tilde{p}_n$ , the retailer decides to sell his SB product such that there are two products in the market, the retailer's profit function is written as  $\tilde{\Pi}_r^{II}(\tilde{p}_s) = (\tilde{p}_s - c_s) \left( \frac{\tilde{p}_n - \tilde{p}_s}{q_n - q_s} - \frac{\tilde{p}_s}{q_s} \right)$ , which is concave in  $\tilde{p}_s$ . If  $\frac{c_s q_n}{q_s} < \tilde{p}_n < \frac{c_s q_n + 2q_n^2 - 2q_n q_s}{2q_n - q_s}$ ,  $\tilde{p}_s^*$  is the interior optimal solution  $\frac{c_s q_n + \tilde{p}_n q_s}{2q_n}$ , following which  $\tilde{\Pi}_r^{II*} |_{\tilde{p}_s = \frac{c_s q_n + \tilde{p}_n q_s}{2q_n}} = \frac{(\tilde{p}_n q_s - c_s q_n)^2}{4q_n q_s (q_n - q_s)}$ ; if  $\tilde{p}_n \geq \frac{c_s q_n}{q_s}$ , then the interior optimal decision does not satisfy the condition  $\frac{\tilde{p}_n - \tilde{p}_s}{q_n - q_s} > \frac{\tilde{p}_s}{q_s}$  such that  $\tilde{p}_s^*$  has to take the boundary value  $\frac{\tilde{p}_n q_s}{q_n}$ , following which  $\tilde{Q}_s = 0$  and  $\tilde{\Pi}_r^{II*} |_{\tilde{p}_s = \frac{\tilde{p}_n q_s}{q_n}} = 0$ ; if  $\tilde{p}_n \geq \frac{c_s q_n + 2q_n^2 - 2q_n q_s}{2q_n - q_s}$ , then the interior optimal decision does not satisfy the condition  $\frac{\tilde{p}_n - \tilde{p}_s}{q_n - q_s} < 1$  such that the  $\tilde{p}_s^*$  has to take the boundary value  $\tilde{p}_n - q_n + q_s$  following which  $\tilde{Q}_n = 0$  and  $\tilde{\Pi}_r^{II*} |_{\tilde{p}_s = \tilde{p}_n - q_n + q_s} = \frac{(q_n - \tilde{p}_n)(\tilde{p}_n - c_s - q_n + q_s)}{q_s}$ .

**Case III:** Given any  $\tilde{p}_n$ , if the retailer decides a retail price  $\tilde{p}_s$  such that the demand of the NB product reduces to 0, the retailer's profit function becomes  $\tilde{\Pi}_r^{III}(\tilde{p}_s) = (\tilde{p}_s - c_s)(1 - \frac{\tilde{p}_s}{q_s})$ . If  $\tilde{p}_n > \frac{c_s + 2q_n - q_s}{2}$ , then  $\tilde{p}_s^*$  is the interior optimal solution  $\frac{c_s + q_s}{2}$  and  $\tilde{\Pi}_r^{III*} |_{\tilde{p}_s = \frac{c_s + q_s}{2}} = \frac{(q_s - c_s)^2}{4q_s}$ ; if  $\tilde{p}_n \leq \frac{c_s + 2q_n - q_s}{2}$ ,

the interior optimal decision does not satisfy the condition  $\frac{\tilde{p}_n - \tilde{p}_s}{q_n - q_s} > 1$  such that  $\tilde{p}_s^*$  has to take the boundary value  $\tilde{p}_n - q_n + q_s$  following which  $\tilde{\Pi}_r^{III*}|_{\tilde{p}_n - q_n + q_s} = \frac{(q_n - \tilde{p}_n)(\tilde{p}_n - c_s - q_n + q_s)}{q_s}$ .

The retailer's best response to any given  $\tilde{p}_n$  is summarized as follows. If  $\tilde{p}_n \leq \frac{c_s q_n}{q_s}$ , then the retailer does not introduce SB; if  $\frac{c_s q_n}{q_s} < \tilde{p}_n < \frac{c_s q_n + 2q_n^2 - 2q_n q_s}{2q_n - q_s}$ , the retailer sells SB product such that both NB and SB products have positive demands, and the optimal retail price for SB is  $\tilde{p}_s^* = \frac{c_s q_n + \tilde{p}_n q_s}{2q_n}$ ; if  $\tilde{p}_n \geq \frac{c_s q_n + 2q_n^2 - 2q_n q_s}{2q_n - q_s}$ , the SB product fully takes over the market and  $\tilde{Q}_n = 0$ . Moreover, if  $\frac{c_s q_n + 2q_n^2 - 2q_n q_s}{2q_n - q_s} \leq \tilde{p}_n \leq \frac{c_s + 2q_n - q_s}{2}$ , the retailer will set  $\tilde{p}_s^* = \tilde{p}_n - q_n + q_s$ ; if  $\tilde{p}_n > \frac{c_s + 2q_n - q_s}{2}$ , the retailer will set  $\tilde{p}_s^* = \frac{c_s + q_s}{2}$ .

Based on the retailer best responses, we now proceed to analyze the NBM's optimal pricing decision. Under case I,  $\tilde{p}_n$  should satisfy  $\tilde{p}_n \leq \frac{c_s q_n}{q_s}$  and the NBM's profit function writes as  $\tilde{\Pi}_n(\tilde{p}_n) = (\tilde{p}_n - c_n)(1 - \frac{\tilde{p}_n}{q_n})$ , a concave function in  $\tilde{p}_n$ . Under case II,  $\tilde{p}_n$  should satisfy  $\frac{c_s q_n}{q_s} < \tilde{p}_n < \frac{c_s q_n + 2q_n^2 - 2q_n q_s}{2q_n - q_s}$ , and the NBM's profit function becomes  $\tilde{\Pi}_n(\tilde{p}_n) = (\tilde{p}_n - c_n)(1 - \frac{\tilde{p}_n - \tilde{p}_s}{q_n - q_s})$ , which is concave in  $\tilde{p}_n$ . For any  $\tilde{p}_n \geq \frac{c_s q_n + 2q_n^2 - 2q_n q_s}{2q_n - q_s}$ ,  $\tilde{\Pi}_n = 0$ . We derive the NBM's local optimal decisions by taking derivatives and checking the conditions of  $\tilde{p}_n$ , then compare the local optima across all possible parameter settings to find the global optimum. The NBM's optimal price and resulting demands for NB and SB are listed in the table below.

|                                                               | $c_n < \frac{2c_s q_n - q_n q_s}{q_s}$                                         | $\frac{2c_s q_n - q_n q_s}{q_s} \leq c_n < \tilde{c}_n^{(1)}$                  | $\tilde{c}_n^{(1)} < c_n \leq \frac{c_s q_n + 2q_n^2 - 2q_n q_s}{2q_n - q_s}$  | $c_n > \frac{c_s q_n + 2q_n^2 - 2q_n q_s}{2q_n - q_s}$ |
|---------------------------------------------------------------|--------------------------------------------------------------------------------|--------------------------------------------------------------------------------|--------------------------------------------------------------------------------|--------------------------------------------------------|
| $c_s < \frac{2q_n q_s - 2q_s^2}{4q_n - 3q_s}$                 | $\tilde{p}_n^* = \frac{q_n(c_s + 2q_n - 2q_s) + c_n(2q_n - q_s)}{4q_n - 2q_s}$ |                                                                                |                                                                                | $\tilde{p}_n^* = 0$                                    |
|                                                               | $\tilde{Q}_n > 0, \tilde{Q}_s > 0$                                             |                                                                                |                                                                                | $\tilde{Q}_n = 0, \tilde{Q}_s > 0$                     |
| $\frac{2q_n q_s - 2q_s^2}{4q_n - 3q_s} < c_s < \frac{q_s}{2}$ | $\tilde{p}_n^* = \frac{c_s q_n}{q_s}$                                          | $\tilde{p}_n^* = \frac{q_n(c_s + 2q_n - 2q_s) + c_n(2q_n - q_s)}{4q_n - 2q_s}$ |                                                                                | $\tilde{p}_n^* = 0$                                    |
|                                                               | $\tilde{Q}_n > 0, \tilde{Q}_s = 0$                                             | $\tilde{Q}_n > 0, \tilde{Q}_s > 0$                                             |                                                                                | $\tilde{Q}_n = 0, \tilde{Q}_s > 0$                     |
| $\frac{q_s}{2} < c_s < q_s$                                   | $\tilde{p}_n^* = \frac{c_n + q_n}{2}$                                          | $\tilde{p}_n^* = \frac{c_s q_n}{q_s}$                                          | $\tilde{p}_n^* = \frac{q_n(c_s + 2q_n - 2q_s) + c_n(2q_n - q_s)}{4q_n - 2q_s}$ | $\tilde{p}_n^* = 0$                                    |
|                                                               | $\tilde{Q}_n > 0, \tilde{Q}_s = 0$                                             | $\tilde{Q}_n > 0, \tilde{Q}_s = 0$                                             | $\tilde{Q}_n > 0, \tilde{Q}_s > 0$                                             | $\tilde{Q}_n = 0, \tilde{Q}_s > 0$                     |

**Table B4** NB manufacturer's optimal price and resulting market segmentation under the competition case

(Note:  $\tilde{c}_n^{(1)} \stackrel{def}{=} \frac{4c_s q_n^2 - 3c_s q_n q_s - 2q_n^2 q_s + 2q_n q_s^2}{2q_n q_s - q_s^2}$ )

In Table B4,  $(\tilde{Q}_n > 0, \tilde{Q}_s = 0)$  denotes that  $\tilde{\Pi}_n^* = \tilde{\Pi}_n^{I*}$  and  $\tilde{\Pi}_r^* = 0$ ;  $(\tilde{Q}_n > 0, \tilde{Q}_s > 0)$  denotes that  $\tilde{\Pi}_n^* = \tilde{\Pi}_n^{II*}$  and  $\tilde{\Pi}_r^* = \tilde{\Pi}_r^{II*}$ ;  $(\tilde{Q}_n = 0, \tilde{Q}_s > 0)$  denotes that  $\tilde{\Pi}_n^* = 0$  and  $\tilde{\Pi}_r^* = \tilde{\Pi}_r^{III*}$ . Note that  $\tilde{c}_n^{(1)} < \frac{c_s q_n}{q_s}$  and  $c_s + q_n - q_s < \frac{c_s q_n + 2q_n^2 - 2q_n q_s}{2q_n - q_s}$ . Recall from Proposition 1 that under the contracting case, SB enters the market if  $c_n \geq \frac{c_s q_n}{q_s}$ . Table B4 indicates that under the competition case, the threshold of introducing SB is lower than that under the contracting case. Therefore, we can conclude that it is more likely for the retailer to introduce SB under the competition case than under the contracting case.

(ii) We can easily obtain the equilibrium profits of the NBM and the retailer by substituting  $(\tilde{p}_n^*, \tilde{p}_s^*)$  into the corresponding  $\tilde{\Pi}_n$  and  $\tilde{\Pi}_r$  functions. Under the contracting case, if  $c_n < \frac{c_s q_n}{q_s}$ ,  $\hat{\Pi}_n^* = \hat{\Pi}_n^{I*}$ ; if

$\frac{c_s q_n}{q_s} \leq c_n \leq c_s + q_n - q_s$ ,  $\hat{\Pi}_n^* = \hat{\Pi}_n^{I*}$ ; if  $c_n > c_s + q_n - q_s$ ,  $\hat{\Pi}_n^* = 0$ . By comparing  $\tilde{\Pi}_n^*$  with  $\hat{\Pi}_n^*$  under all possible parameter settings, we find that if  $c_n \leq \frac{c_s q_n + 2q_n^2 - 2q_n q_s}{2q_n - q_s}$ ,  $\tilde{\Pi}_n^* > \hat{\Pi}_n^*$ ; otherwise,  $\tilde{\Pi}_n^* = \hat{\Pi}_n^* = 0$ .

(iii) Similar to (ii), we compare  $\tilde{\Pi}_r^*$  with  $\hat{\Pi}_r^*$  under all possible parameter settings. The comparison result indicates that if  $c_n \leq \frac{c_s q_n + 2q_n^2 - 2q_n q_s}{2q_n - q_s}$ ,  $\tilde{\Pi}_r^* < \hat{\Pi}_r^*$ ; otherwise,  $\tilde{\Pi}_r^* = \hat{\Pi}_r^* = \hat{\Pi}_r^{III*}$ .

(iv) Similar to (ii) and (iii), we compare the channel profit under the competition case (i.e.,  $\tilde{\Pi}_n^* + \tilde{\Pi}_r^*$ ) with the channel profit under the contracting case (i.e.,  $\hat{\Pi}_n^* + \hat{\Pi}_r^*$ ). We obtain that if  $c_n \leq \frac{c_s q_n + 2q_n^2 - 2q_n q_s}{2q_n - q_s}$ ,  $\tilde{\Pi}_n^* + \tilde{\Pi}_r^* < \hat{\Pi}_n^* + \hat{\Pi}_r^*$ ; otherwise,  $\tilde{\Pi}_n^* + \tilde{\Pi}_r^* = \hat{\Pi}_n^* + \hat{\Pi}_r^*$ .
